# Supplementary material
Source: publisher figshare collection journal article supplement (https://tandf.figshare.com/ndownloader/files/30824691)
Supplement: Supplementary file 1 [file 30824691]

| Appendix D. Patient reported outcomes: urinary symptoms at different time points | | | | | | | | | |
| --- | --- | --- | --- | --- | --- | --- | --- | --- | --- |
|  | Symptoms | **Baseline (N=71-73)** | **Post-RT (N=74-75)** | **3 months (N=78-80)** | **6 months (N=78-80)** | **12 months (N=78-80)** | **24 months (N=73-75)** | **36 months (N=70-72)** | **60 months (N=57-60)** |
| Voiding (obstructive) symptoms | Hesitancy* | 9(12) | 20(27)# | 11(14) | 9(11) | 10(13) | 6(7) | 8(11) | 3(5) |
| Weak or dribbling urinary stream | 11(15) | 25(33)# | 14(18) | 16(20) | 12(15) | 13(18) | 14(19) | 9(15) |
| Bladder emptying ** | 8(11) | 24(32)# | 18(22) | 15(19) | 12(15) | 13(18) | 18(25)# | 8(13) |
| Straining* | 6(8) | 19(25)# | 10(13) | 5(6) | 8(10) | 5(7) | 7(10) | 4(7) |
| Storage (irritative) symptoms | Frequency$ | 14(19) | 37(49)# | 25(32) | 25(32) | 19(24) | 15(20) | 14(19) | 12(21) |
| Nocturia§ | 12(16) | 49(65)# | 35(45)# | 30(38)# | 33(42)# | 28(38)# | 25(35)# | 12(21) |
| Urge to urinate* | 21(30) | 51(68)# | 35(44) | 28(35) | 30(38) | 24(32) | 24(33) | 16(27) |
| Urge incontinence* | 21(30) | 51(68)# | 35(44) | 28(35) | 30(38) | 24(32) | 24(33) | 16(27) |
| Miscellaneous symptoms | Pain* | 0 | 26(35)# | 6(7)# | 2(3) | 4(5) | 2(3) | 3(49 | 2(3) |
| Terminal dribbling¤ | 15(21) | 20(27) | 22(27) | 18(23) | 19(24) | 20(27) | 22(31) | 16(28) |
| Stress incontinence* | 0 | 2(3) | 2(2) | 1(1) | 3(4) | 3(4) | 3(4) | 1(2) |
| Other incontinence* | 0 | 4(5) | 1(1) | 2(3) | 2(2) | 4(6) | 3(4) | 2(3) |
| Numbers in () are percentages, *Daily or every time, **Rarely or never feeling emptiness of the bladder, $ < 2 hours, § ≥ 3 times every night, ¤ Terminal dribbling in underwear, # Significantly different compared to baseline (p<0.05). | | | | | | | | | |
